# Supplementary material for: Detection, identification and control of polar iodinated disinfection byproducts in chlor(am)inated secondary wastewater effluents
Source: Royal Society of Chemistry journal article supplement (doi:10.1039/c8ew00718g), 2018-12-06
Supplement: c8ew00718g1.pdf [file c8ew00718g1.pdf]

## Supporting Information

### Detection, identification and control of polar iodinated disinfection byproducts in chlor(am)inated secondary wastewater effluents

Yan Huang <sup>a</sup>, Yangyang Zhang <sup>a</sup>, Qing Zhou <sup>a</sup>, Aimin Li <sup>a</sup>, Peng Shi <sup>a</sup>, Jingfan Qiu <sup>b,\*</sup>, Yang Pan <sup>a,\*</sup>

<sup>a</sup> State Key Laboratory of Pollution Control and Resource Reuse, School of the Environment, Nanjing University, Nanjing 210023, China

<sup>b</sup> Key Laboratory of Pathogen Biology of Jiangsu Province, Department of Pathogen Biology, Nanjing Medical University, Nanjing 211166, China

\*Corresponding author (Qiu, J.) email: [qiujiangfan@njmu.edu.cn](mailto:qiujiangfan@njmu.edu.cn); (Pan, Y.) e-mail: [panyang@nju.edu.cn](mailto:panyang@nju.edu.cn)

#### Contents of the Supporting Information

1. Structure proposing of the Compound with  $m/z$  199 at RT 2.33 min
2. Structure proposing of the Compound with  $m/z$  257 at RT 1.74 min
3. Structure proposing of the Compound with  $m/z$  285 at RT 3.05 min
4. Structure proposing of the Compound with  $m/z$  317 at RT 7.14 min
5. Structure proposing of the Compound with  $m/z$  331 at RT 8.01 min
6. Structure proposing of the Compound with  $m/z$  357 at RT 5.13 min
7. Structure proposing of the Compound with  $m/z$  361 at RT 7.65 min
8. Structure proposing of the Compound with  $m/z$  377 at RT 6.30 min
9. Structure proposing of the Compound with  $m/z$  399/401/403 at RT 3.67 min
10. Structure proposing of the Compound with  $m/z$  417 at RT 3.86 min

Fig. S1. Residual chlorine with different chlorine doses.

Fig. S2. (a) UPLC/ESI-tqMS MRM (199→126.9) chromatogram of chlorinated secondary wastewater effluent sample A<sub>1</sub>; (b) UPLC/ESI-tqMS product ion scan spectrum of  $m/z$  199 of chlorinated secondary wastewater effluent sample A<sub>1</sub> at RT 2.33 min.

Fig. S3. (a) UPLC/ESI-tqMS MRM (257→126.9) chromatogram of chlorinated secondary wastewater effluent sample A<sub>1</sub>; (b) UPLC/ESI-tqMS product ion scan spectrum of  $m/z$  257 of chlorinated secondary wastewater effluent sample A<sub>1</sub> at RT 1.74 min.

Fig. S4. (a) UPLC/ESI-tqMS MRM (285→126.9) chromatogram of chlorinated secondary wastewater effluent sample A<sub>1</sub>; (b) UPLC/ESI-tqMS product ion scan spectrum of  $m/z$  285 of chlorinated secondary wastewater effluent sample A<sub>1</sub> at RT 2.82 min.

Fig. S5. (a) UPLC/ESI-tqMS MRM (317→126.9) chromatogram of chlorinated secondary wastewater effluent sample A<sub>1</sub>; (b) UPLC/ESI-tqMS product ion scan spectrum of  $m/z$  317 of chlorinated secondary wastewater effluent sample A<sub>1</sub> at RT 7.14 min.

Fig. S6. (a) UPLC/ESI-tqMS MRM (331→126.9) chromatogram of chlorinated secondary wastewater effluent sample A<sub>1</sub>; (b) UPLC/ESI-tqMS product ion scan spectrum of  $m/z$  331 of chlorinated secondary wastewater effluent sample A<sub>1</sub> at RT 8.01min.

Fig. S7. (a) UPLC/ESI-tqMS MRM (357→126.9) chromatogram of chlorinated secondary wastewater effluent

sample A<sub>1</sub>; (b) UPLC/ESI-tqMS product ion scan spectrum of *m/z* 357 of chlorinated secondary wastewater effluent sample A<sub>1</sub> at RT 5.13 min.

Fig. S8. (a) UPLC/ESI-tqMS MRM (361→126.9) chromatogram of chlorinated secondary wastewater effluent sample A<sub>1</sub>; (b) UPLC/ESI-tqMS product ion scan spectrum of *m/z* 361 of chlorinated secondary wastewater effluent sample A<sub>1</sub> at RT 7.65 min.

Fig. S9. (a) UPLC/ESI-tqMS MRM (377→126.9) chromatogram of chlorinated secondary wastewater effluent sample A<sub>1</sub>; (b) UPLC/ESI-tqMS product ion scan spectrum of *m/z* 377 of chlorinated secondary wastewater effluent sample A<sub>1</sub> at RT 6.30 min.

Fig. S10. (a) UPLC/ESI-tqMS MRM (399→126.9, 401→126.9, 403→126.9) chromatogram of chlorinated secondary wastewater effluent sample A<sub>1</sub>; (b–d) UPLC/ESI-tqMS product ion scan spectra of *m/z* 399/401/403 of chlorinated secondary wastewater effluent sample A<sub>1</sub> at RT 3.67 min.

Fig. S11. (a) UPLC/ESI-tqMS MRM (417→126.9) chromatograms of chlorinated secondary wastewater effluent sample A<sub>2</sub>; (b) UPLC/ESI-tqMS product ion scan spectrum of *m/z* 417 of chlorinated secondary wastewater effluent sample A<sub>2</sub> at RT 3.86 min.

Fig. S12. DOC concentration in secondary wastewater effluent sample A<sub>1</sub> with different dosages of coagulant and resin.

Table S1. Characteristics of the secondary wastewater effluent samples A<sub>1</sub> and A<sub>2</sub>

### 1. Structure Proposing of the Compound with $m/z$ 199 at RT 2.33 min

As shown in Fig. 1, the compound with  $m/z$  199 has only one isotopic peak, indicating that this compound should contain only I (without containing Cl or Br). Fig. S2 shows the product ion scan spectrum of this compound: a loss of 44 was observed, indicating a carboxyl group. After subtraction of one iodine atom and a carboxyl group from  $m/z$  199, the remaining part is 29 (i.e.,  $199 - 126.9 - 44 = 29$ ), for which a reasonable combination should be  $C_2H_4$ . Accordingly, this compound was proposed to be 3-iodo-propanoic acid.

### 2. Structure Proposing of the Compound with $m/z$ 257 at RT 1.74 min

As shown in Fig. 1, the compound with  $m/z$  257 has only one isotopic peak, indicating that this compound should contain only I (without containing Cl or Br). Fig. S3 shows the product ion scan spectrum of this compound: the consecutive loss of two 44 were observed, indicating two carboxyl group. After subtraction of one iodine atom and two a carboxyl group from  $m/z$  257, the remaining part is 42 (i.e.,  $257 - 126.9 - 88 = 42$ ), for which a reasonable combination should be  $C_3H_6$ . Accordingly, this compound was proposed to be  $HOOC(CH_2)_2CHICOOH$ .

### 3. Structure Proposing of the Compound with $m/z$ 285 at RT 2.82 min

As shown in Fig. 1, the compound with  $m/z$  285 has only one isotopic peak, indicating that this compound should contain only I (without containing Cl or Br). Fig. S4 shows the product ion scan spectrum of this compound: the consecutive loss of two 44 were observed, indicating two carboxyl group. After subtraction of one iodine atom and one a carboxyl group from  $m/z$  285, the remaining part is 70 (i.e.,  $285 - 126.9 - 88 = 70$ ). Notably, this compound has an  $m/z$  value which is 28 larger than the compound with  $m/z$  257 (which was proposed to be  $HOOC(CH_2)_2CHICOOH$ ), and thus it was proposed to contain one more aldehyde group or  $C_2H_4$  than  $HOOC(CH_2)_2CHICOOH$ . However, no loss of 28 was occurred in the product ion scan spectrum of this compound so a reasonable combination of the remaining part should be  $C_5H_{10}$ . Accordingly, this compound was proposed to be  $HOOC(CH_2)_4CHICOOH$ .

### 4. Structure Proposing of the Compound with $m/z$ 317 at RT 7.14 min

As shown in Fig. 1, the compound with  $m/z$  317 has only one isotopic peak, indicating that this compound should contain only I (without containing Cl or Br). The relatively long RT (7.14 min) suggests that this compound was aromatic (Zhai and Zhang, 2011). Notably, this compound has an  $m/z$  value which is 28 larger than the compound with  $m/z$  303 (which was proposed to be 5-iodo-3-(1-propen-1yl)-4-hydroxybenzoic acid), and thus it was proposed to contain one more  $CH_2$  than 5-iodo-3-(1-propen-1yl)-4-hydroxybenzoic acid. Accordingly, this compound was proposed to be 5-iodo-3-(1-buten-1-yl)-4-hydroxybenzoic acid.

### 5. Structure Proposing of the Compound with $m/z$ 331 at RT 8.01 min

As shown in Fig. 1, the compound with  $m/z$  331 has only one isotopic peak, indicating that this compound should contain only I (without containing Cl or Br). The relatively long RT (8.01 min) suggests that this compound was aromatic (Zhai and Zhang, 2011). Notably, this compound has

an  $m/z$  value which is 14 larger than the compound with  $m/z$  317 (which was proposed to be 5-iodo-3-(1-buten-1-yl)-4-hydroxybenzoic acid), and thus it was proposed to contain one more  $\text{CH}_2$  than 5-iodo-3-(1-buten-1-yl)-4-hydroxybenzoic acid. Accordingly, this compound was proposed to be 5-iodo-3-(1-penten-1-yl)-4-hydroxybenzoic acid.

#### **6. Structure Proposing of the Compound with $m/z$ 357 at RT 5.13 min**

As shown in Fig. 1, the compound with  $m/z$  357 has only one isotopic peak, indicating that this compound should contain only I (without containing Cl or Br). The relatively long RT (5.13 min) suggests that this compound was aromatic (Zhai and Zhang, 2011). Notably, this compound has an  $m/z$  value which is 26 larger than the compound with  $m/z$  331 (which was proposed to be 5-iodo-3-(1-penten-1-yl)-4-hydroxybenzoic acid), and thus it was proposed to contain one more  $\text{CH}_2$  than 5-iodo-3-(1-penten-1-yl)-4-hydroxybenzoic acid. Accordingly, this compound was proposed to be 5-iodo-3-(1-hepten-1,5-diyl)-4-hydroxybenzoic acid.

#### **7. Structure Proposing of the Compound with $m/z$ 361 at RT 7.65 min**

As shown in Fig. 1, the compound with  $m/z$  361 has only one isotopic peak, indicating that this compound should contain only I (without containing Cl or Br). The relatively long RT (7.65 min) suggests that this compound was aromatic (Zhai and Zhang, 2011). Notably, this compound has an  $m/z$  value which is 44 larger than the compound with  $m/z$  317 (which was proposed to be 5-iodo-3-(1-buten-1-yl)-4-hydroxybenzoic acid), and thus it was proposed to contain one more carboxyl group than 5-iodo-3-(1-buten-1-yl)-4-hydroxybenzoic acid. Accordingly, this compound was proposed to be 5-iodo-3-(1-buten-1-yl)-4-hydroxy-1,2-benzenedicarboxylic acid.

#### **8. Structure Proposing of the Compound with $m/z$ 377 at RT 6.30 min**

As shown in Fig. 1, the compound with  $m/z$  377 has only one isotopic peak, indicating that this compound should contain only I (without containing Cl or Br). The relatively long RT (6.30 min) suggests that this compound was aromatic (Zhai and Zhang, 2011). Notably, this compound has an  $m/z$  value which is 16 larger than the compound with  $m/z$  361 (which was proposed to be 5-iodo-3-(1-buten-1-yl)-4-hydroxy-1,2-benzenedicarboxylic acid), and thus it was proposed to contain one more hydroxyl group than 5-iodo-3-(1-buten-1-yl)-4-hydroxy-1,2-benzenedicarboxylic acid. Accordingly, this compound was proposed to be 5-iodo-3-(1-buten-1-yl)-1,4-dihydroxy-1,2-benzenedicarboxylic acid.

#### **9. Structure Proposing of the Compound with $m/z$ 399/401/403 at RT 3.67 min**

Fig. S10 shows the MRM chromatogram ( $399 \rightarrow 126.9$ ,  $401 \rightarrow 126.9$ ,  $403 \rightarrow 126.9$ ) and the product ion scan spectra of ion cluster  $m/z$  399/401/403 of the sample. The relatively long RT (3.67 min) suggested that this compound was likely aromatic (Zhai and Zhang, 2011). An isotopic peak abundance ratio of  $m/z$  399/401/403 at 9:3:1 was observed in the MRM spectrum of the ion cluster, indicating that this compound should contain two chlorine atoms. In the product ion scan spectra of  $m/z$  399, 401 and 403, the consecutive loss of two 44 were observed, indicating two carboxyl group. Since this ion cluster was detected by PIS  $m/z$  126.9, it should at least contain one iodine

atom. After subtraction of one benzene ring, two chlorine atom, two benzoic acid and one iodine atom from  $m/z$  399/401/403, the remaining part was 41, for which a reasonable combination should be  $C_3H_5$ . Accordingly, this compound was proposed to be 3,5-dichlo-6-iodo-4-(1-propen-1-yl) - 1,2-benzenedicarboxylic acid.

#### **10. Structure Proposing of the Compound with $m/z$ 417 at RT 3.86 min**

As shown in Fig. 1, the compound with  $m/z$  417 has only one isotopic peak, indicating that this compound should contain only I (without containing Cl or Br). The relatively long RT (3.86 min) suggested that this compound was likely aromatic (Zhai and Zhang, 2011). Fig. S11 shows the product ion scan spectrum of this compound: a loss of 44 were observed, indicating one carboxyl group, a loss of 28 were observed, indicating one aldehyde group and a loss of 16 were observed, indicating one hydroxyl group. Notably, this compound has an  $m/z$  value which is 44 larger than the compound with  $m/z$  373 (which was proposed to be 3,5-diiodo-4-hydroxybenzoic acid), and thus it was proposed to contain one more carboxyl group than 3,5-diiodo-4-hydroxybenzoic acid. Accordingly, this compound was proposed to be 3,5-diiodo-4-hydroxy-1-hydroxybenzaldehyde.

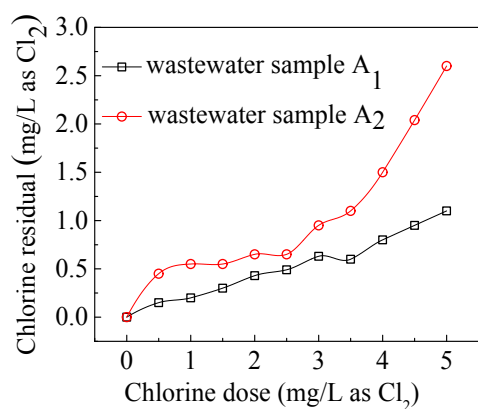

**Fig. S1. Residual chlorine with different chlorine doses.**

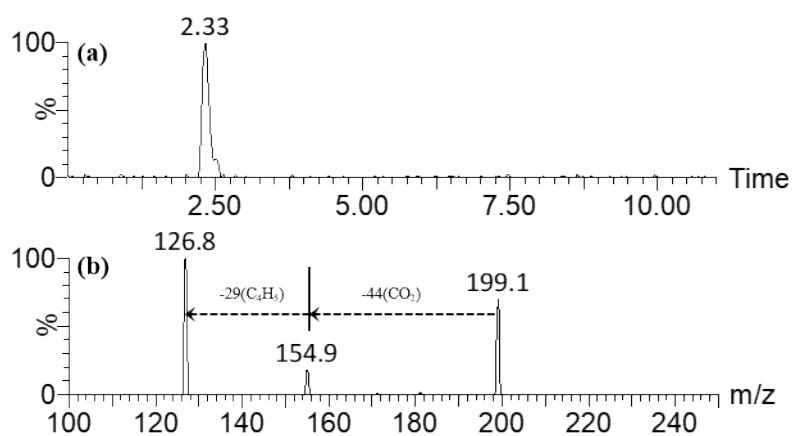

**Fig. S2. (a) UPLC/ESI-tqMS MRM (199→126.9) chromatogram of chlorinated secondary wastewater effluent sample A<sub>1</sub>; (b) UPLC/ESI-tqMS product ion scan spectrum of *m/z* 199 of chlorinated secondary wastewater effluent sample A<sub>1</sub> at RT 2.33 min.**

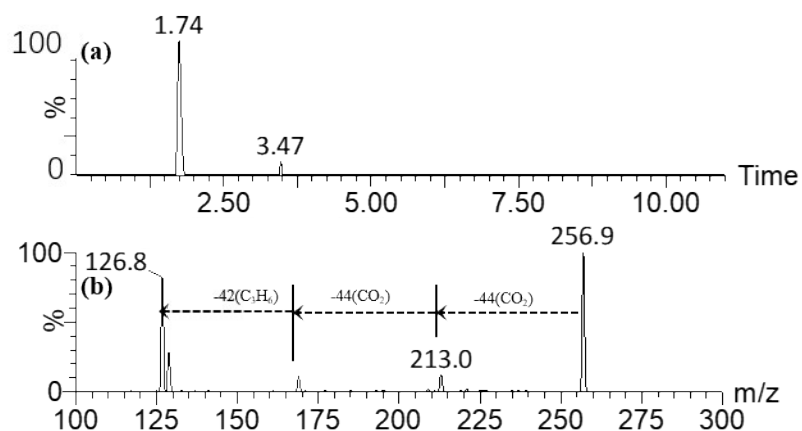

**Fig. S3. (a) UPLC/ESI-tqMS MRM (257→126.9) chromatogram of chlorinated secondary wastewater effluent sample A<sub>1</sub>; (b) UPLC/ESI-tqMS product ion scan spectrum of  $m/z$  257 of chlorinated secondary wastewater effluent sample A<sub>1</sub> at RT 1.74 min.**

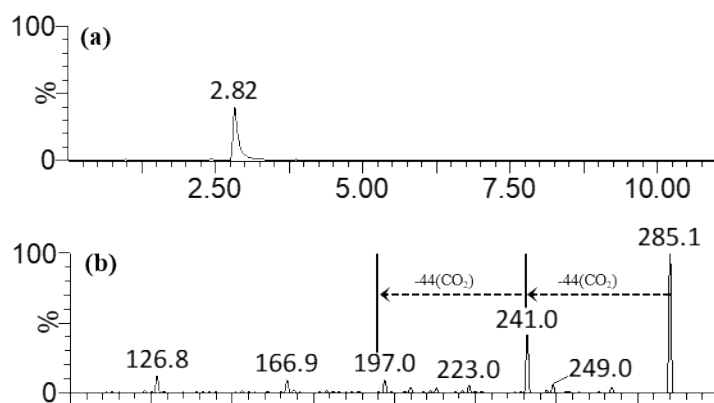

**Fig. S4. (a) UPLC/ESI-tqMS MRM (285→126.9) chromatogram of chlorinated secondary wastewater effluent sample A<sub>1</sub>; (b) UPLC/ESI-tqMS product ion scan spectrum of  $m/z$  285 of chlorinated secondary wastewater effluent sample A<sub>1</sub> at RT 2.82 min.**

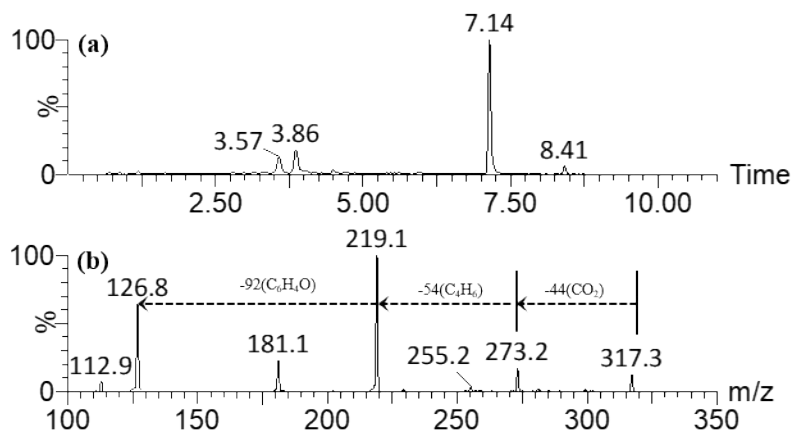

**Fig. S5. (a) UPLC/ESI-tqMS MRM (317→126.9) chromatogram of chlorinated secondary wastewater effluent sample A<sub>1</sub>; (b) UPLC/ESI-tqMS product ion scan spectrum of *m/z* 317 of chlorinated secondary wastewater effluent sample A<sub>1</sub> at RT 7.14 min.**

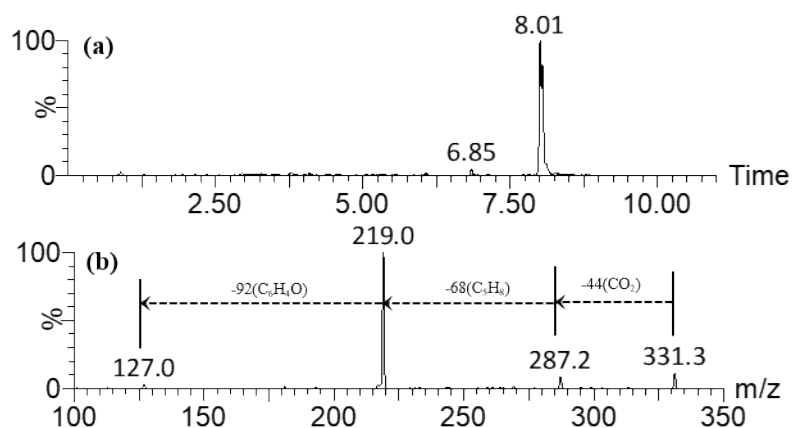

**Fig. S6. (a) UPLC/ESI-tqMS MRM (331→126.9) chromatogram of chlorinated secondary wastewater effluent sample A<sub>1</sub>; (b) UPLC/ESI-tqMS product ion scan spectrum of *m/z* 331 of chlorinated secondary wastewater effluent sample A<sub>1</sub> at RT 8.01min.**

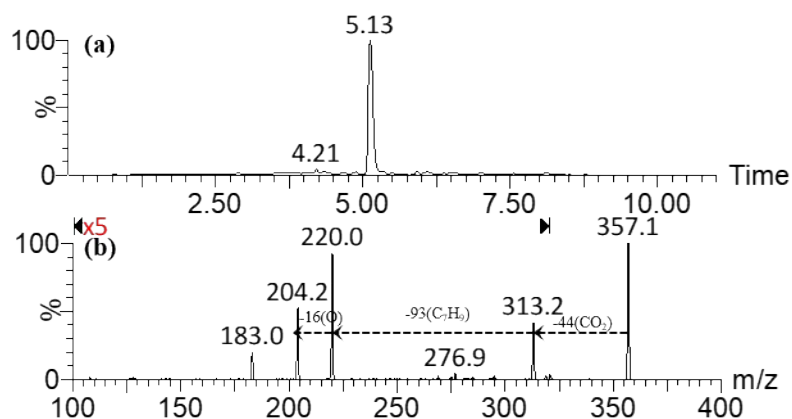

**Fig. S7. (a) UPLC/ESI-tqMS MRM (357→126.9) chromatogram of chlorinated secondary wastewater effluent sample A<sub>1</sub>; (b) UPLC/ESI-tqMS product ion scan spectrum of *m/z* 357 of chlorinated secondary wastewater effluent sample A<sub>1</sub> at RT 5.13 min.**

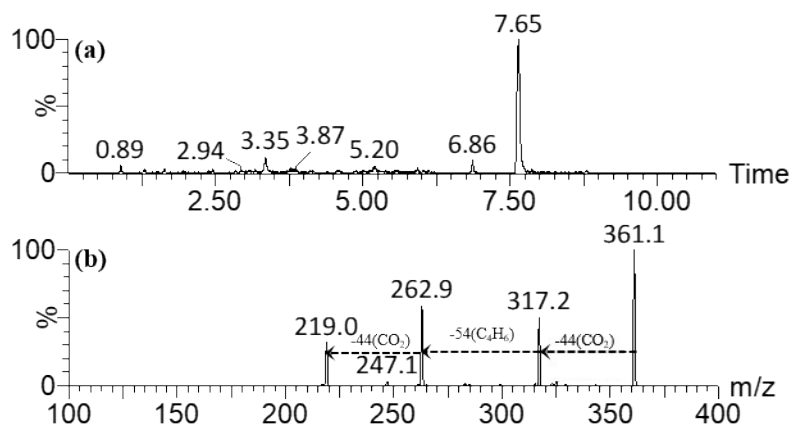

**Fig. S8. (a) UPLC/ESI-tqMS MRM (361→126.9) chromatogram of chlorinated secondary wastewater effluent sample A<sub>1</sub>; (b) UPLC/ESI-tqMS product ion scan spectrum of *m/z* 361 of chlorinated secondary wastewater effluent sample A<sub>1</sub> at RT 7.65 min.**

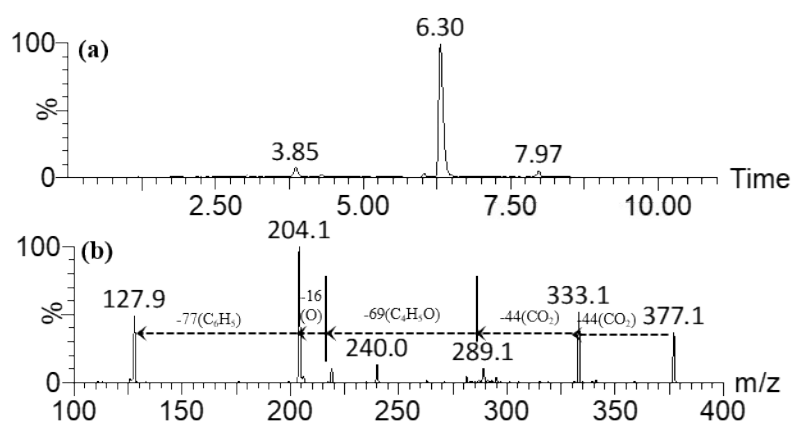

**Fig. S9. (a) UPLC/ESI-tqMS MRM (377→126.9) chromatogram of chlorinated secondary wastewater effluent sample A<sub>1</sub>; (b) UPLC/ESI-tqMS product ion scan spectrum of *m/z* 377 of chlorinated secondary wastewater effluent sample A<sub>1</sub> at RT 6.30 min.**

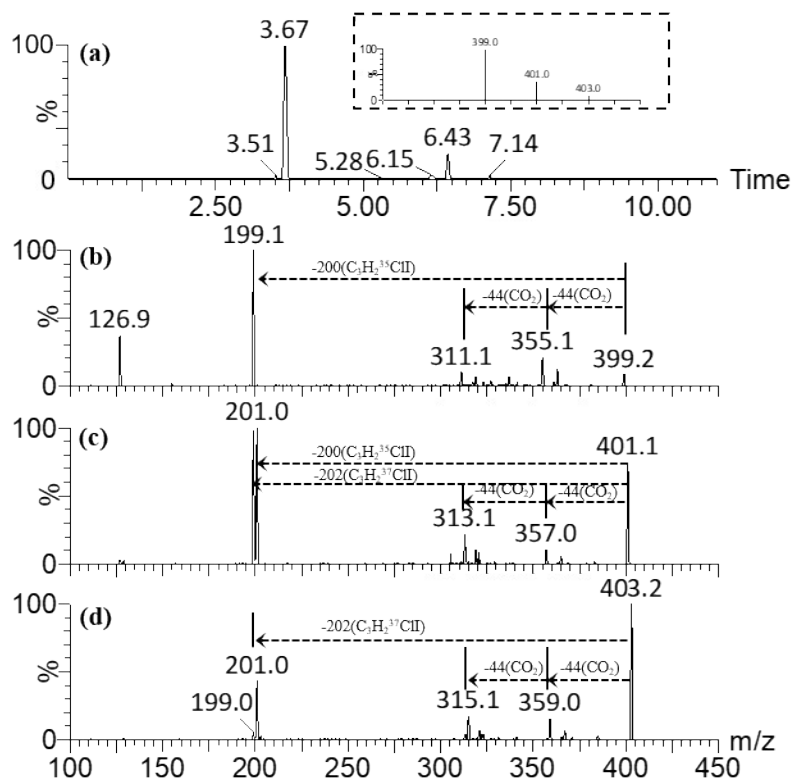

**Fig. S10. (a) UPLC/ESI-tqMS MRM (399→126.9, 401→126.9, 403→126.9) chromatogram of chlorinated secondary wastewater effluent sample A<sub>1</sub>; (b–d) UPLC/ESI-tqMS product ion scan spectra of *m/z* 399/401/403 of chlorinated secondary wastewater effluent sample A<sub>1</sub> at RT 3.67 min.**

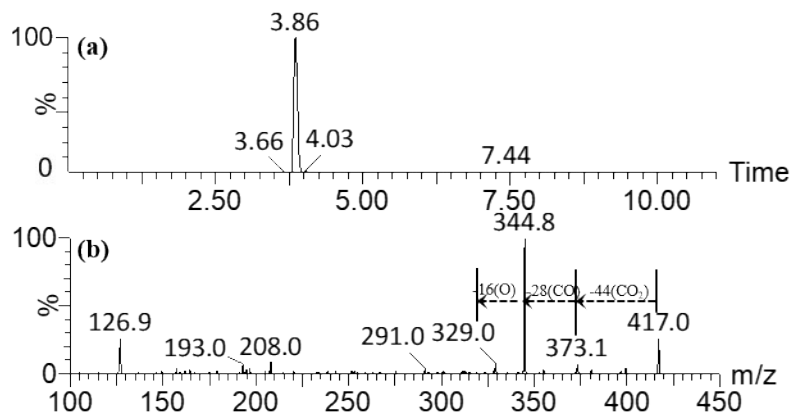

**Fig. S11. (a) UPLC/ESI-tqMS MRM (417→126.9) chromatograms of chlorinated secondary wastewater effluent sample A<sub>2</sub>; (b) UPLC/ESI-tqMS product ion scan spectrum of *m/z* 417 of chlorinated secondary wastewater effluent sample A<sub>2</sub> at RT 3.86 min.**

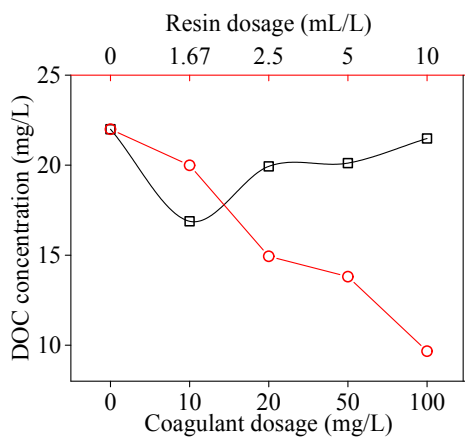

**Fig. S12. DOC concentration in secondary wastewater effluent sample A<sub>1</sub> with different dosages of coagulant and resin.**

**Table S1****Characteristics of the secondary wastewater effluent samples A<sub>1</sub> and A<sub>2</sub>**

| sample         | pH   | DOC as C (mg/L) | ammonia as N (mg/L) | I <sup>-</sup> (µg/L) | UV <sub>254</sub> (l/cm) |
|----------------|------|-----------------|---------------------|-----------------------|--------------------------|
| A <sub>1</sub> | 7.69 | 22.87           | 0.42                | 7.1                   | 0.27                     |
| A <sub>2</sub> | 7.75 | 21.58           | 0.38                | 7.8                   | 0.16                     |
